# Supplementary material for: Feeding Cues and Injected Nutrients Induce Acute Expression of Multiple Clock Genes in the Mouse Liver
Source: PubMed Central journal article supplement (PMC3162004; doi:10.1371/journal.pone.0023709), 2011-08-25
Supplement: pone.0023709.s004.pdf [file pone.0023709.s004.pdf]

| Accession    | Gene Symbol   | Average (Max = 100) |      |      |      |      |      |      |      |     |      | SE | One way ANOVA (24h-32h) |      |      |      |      |      |       |                     |                                    |
|--------------|---------------|---------------------|------|------|------|------|------|------|------|-----|------|----|-------------------------|------|------|------|------|------|-------|---------------------|------------------------------------|
|              |               | 6 h                 | 12 h | 18 h | 24 h | 25 h | 26 h | 28 h | 32 h | 6 h | 12 h |    | 18 h                    | 24 h | 25 h | 26 h | 28 h | 32 h | p     | *p<0.05<br>**p<0.01 | Dunnett's test<br>p<0.05 (vs 24 h) |
|              |               |                     |      |      |      |      |      |      |      |     |      |    |                         |      |      |      |      |      |       |                     |                                    |
| NM_011076    | Abcb1a        | 97                  | 65   | 100  | 60   | 63   | 56   | 66   | 84   |     | 25   | 7  | 17                      | 11   | 5    | 2    | 10   | 28   | 0.171 |                     |                                    |
| NM_008830    | Abcb4         | 100                 | 82   | 84   | 62   | 93   | 72   | 69   | 40   |     | 50   | 12 | 17                      | 12   | 17   | 9    | 16   | 6    | 0.243 |                     |                                    |
| NM_133360    | Acaca         | 100                 | 50   | 46   | 30   | 29   | 37   | 49   | 59   |     | 28   | 6  | 11                      | 1    | 1    | 4    | 4    | 8    | 0.000 | **                  | 32 h                               |
| NM_007382    | Acadm         | 100                 | 69   | 78   | 64   | 67   | 64   | 82   | 46   |     | 36   | 6  | 9                       | 10   | 4    | 3    | 15   | 7    | 0.443 |                     |                                    |
| NM_007383    | Acads         | 100                 | 59   | 58   | 42   | 48   | 42   | 52   | 37   |     | 31   | 6  | 5                       | 5    | 3    | 3    | 5    | 5    | 0.173 |                     |                                    |
| NM_207624    | Ace           | 100                 | 68   | 62   | 47   | 60   | 56   | 65   | 47   |     | 27   | 5  | 4                       | 2    | 6    | 2    | 5    | 6    | 0.314 |                     |                                    |
| NM_015729    | Acox1         | 100                 | 47   | 58   | 42   | 47   | 37   | 45   | 24   |     | 32   | 7  | 12                      | 2    | 5    | 7    | 11   | 8    | 0.226 |                     |                                    |
| NM_053115    | Acox2         | 100                 | 67   | 70   | 61   | 74   | 58   | 69   | 54   |     | 24   | 7  | 6                       | 6    | 10   | 4    | 6    | 8    | 0.154 |                     |                                    |
| NM_030721    | Acox3         | 100                 | 64   | 61   | 48   | 58   | 53   | 62   | 40   |     | 31   | 5  | 4                       | 1    | 7    | 2    | 5    | 5    | 0.210 |                     |                                    |
| NM_007981    | Acs11         | 100                 | 81   | 66   | 51   | 63   | 60   | 66   | 27   |     | 41   | 13 | 8                       | 13   | 8    | 4    | 5    | 8    | 0.325 |                     |                                    |
| NM_001033600 | Acs14         | 83                  | 50   | 62   | 47   | 85   | 74   | 100  | 90   |     | 15   | 4  | 19                      | 10   | 33   | 7    | 9    | 13   | 0.191 |                     |                                    |
| NM_080575    | Acss1         | 100                 | 79   | 67   | 62   | 71   | 70   | 71   | 53   |     | 26   | 5  | 8                       | 4    | 6    | 6    | 2    | 4    | 0.384 |                     |                                    |
| NM_007393    | Actb          | 78                  | 60   | 68   | 57   | 60   | 87   | 98   | 100  |     | 11   | 8  | 19                      | 11   | 6    | 15   | 4    | 11   | 0.008 | **                  | 32 h                               |
| NM_009605    | Adipoq        | 100                 | 72   | 62   | 59   | 60   | 65   | 67   | 48   |     | 29   | 6  | 7                       | 3    | 4    | 3    | 2    | 4    | 0.189 |                     |                                    |
| NM_197985    | Adipor2       | 100                 | 63   | 56   | 39   | 46   | 48   | 56   | 46   |     | 13   | 7  | 5                       | 2    | 5    | 3    | 6    | 5    | 0.126 |                     |                                    |
| NM_007428    | Agt           | 100                 | 79   | 77   | 64   | 61   | 58   | 65   | 46   |     | 24   | 5  | 6                       | 8    | 2    | 5    | 1    | 5    | 0.272 |                     |                                    |
| NM_009647    | Ak311         | 100                 | 69   | 57   | 48   | 48   | 54   | 55   | 45   |     | 32   | 6  | 14                      | 5    | 4    | 1    | 7    | 3    | 0.220 |                     |                                    |
| NM_013913    | Angptl3       | 100                 | 57   | 52   | 54   | 38   | 48   | 51   | 44   |     | 23   | 6  | 5                       | 3    | 4    | 4    | 4    | 4    | 0.062 |                     |                                    |
| NM_020581    | Angptl4       | 100                 | 85   | 63   | 62   | 30   | 14   | 20   | 13   |     | 23   | 14 | 2                       | 10   | 9    | 1    | 1    | 2    | 0.000 | **                  | 25, 26, 28, 32 h                   |
| NM_020581    | Angptl4       | 100                 | 95   | 71   | 61   | 35   | 18   | 28   | 15   |     | 29   | 15 | 1                       | 13   | 10   | 1    | 2    | 2    | 0.001 | **                  | 25, 26, 28, 32 h                   |
| NM_009703    | Araf          | 100                 | 82   | 85   | 65   | 66   | 62   | 78   | 59   |     | 26   | 3  | 16                      | 5    | 10   | 3    | 3    | 3    | 0.225 |                     |                                    |
| NM_007475    | Arbp          | 100                 | 82   | 79   | 74   | 83   | 84   | 100  | 85   |     | 15   | 3  | 8                       | 3    | 3    | 2    | 9    | 3    | 0.085 |                     |                                    |
| NM_007489    | Arntl (Bmal1) | 99                  | 67   | 72   | 68   | 73   | 66   | 100  | 78   |     | 20   | 8  | 8                       | 7    | 10   | 5    | 13   | 12   | 0.064 |                     |                                    |
| NM_172309    | Arntl2        | 100                 | 76   | 67   | 56   | 75   | 73   | 82   | 53   |     | 21   | 10 | 5                       | 4    | 7    | 4    | 8    | 6    | 0.385 |                     |                                    |
| NM_016774    | Atp5b         | 100                 | 66   | 67   | 51   | 54   | 53   | 61   | 52   |     | 27   | 6  | 9                       | 5    | 8    | 2    | 4    | 3    | 0.047 | *                   |                                    |
| NM_020615    | Atp5c1        | 100                 | 63   | 65   | 47   | 47   | 51   | 62   | 51   |     | 33   | 4  | 7                       | 4    | 4    | 1    | 6    | 4    | 0.020 | *                   |                                    |
| NM_025983    | Atp5e         | 100                 | 79   | 70   | 58   | 66   | 61   | 63   | 61   |     | 10   | 4  | 7                       | 1    | 3    | 1    | 4    | 5    | 0.088 |                     |                                    |
| NM_016755    | Atp5j         | 100                 | 69   | 62   | 56   | 59   | 57   | 55   | 53   |     | 14   | 3  | 4                       | 2    | 3    | 3    | 2    | 5    | 0.082 |                     |                                    |
| NM_138597    | Atp5o         | 100                 | 69   | 61   | 51   | 54   | 56   | 61   | 56   |     | 19   | 5  | 2                       | 3    | 4    | 2    | 1    | 4    | 0.047 | *                   |                                    |
| NM_018794    | Atp6ap1       | 100                 | 66   | 81   | 64   | 66   | 71   | 74   | 59   |     | 31   | 6  | 21                      | 2    | 7    | 4    | 4    | 5    | 0.139 |                     |                                    |
| NM_016920    | Atp6v0a1      | 100                 | 61   | 58   | 51   | 58   | 53   | 70   | 66   |     | 21   | 6  | 2                       | 3    | 5    | 2    | 2    | 11   | 0.020 | *                   |                                    |
| NM_033617    | Atp6v0b       | 100                 | 55   | 67   | 44   | 54   | 47   | 57   | 40   |     | 33   | 5  | 18                      | 6    | 6    | 4    | 5    | 2    | 0.445 |                     |                                    |
| NM_013477    | Atp6v0d1      | 100                 | 61   | 66   | 48   | 51   | 55   | 68   | 50   |     | 36   | 4  | 13                      | 3    | 6    | 3    | 4    | 6    | 0.148 |                     |                                    |
| NM_007509    | Atp6v1b2      | 100                 | 74   | 85   | 68   | 65   | 58   | 67   | 55   |     | 27   | 4  | 24                      | 8    | 9    | 2    | 4    | 6    | 0.226 |                     |                                    |
| NM_007510    | Atp6v1e1      | 100                 | 72   | 82   | 62   | 63   | 61   | 68   | 55   |     | 27   | 5  | 21                      | 3    | 10   | 3    | 2    | 1    | 0.125 |                     |                                    |
| NM_025381    | Atp6v1f       | 100                 | 77   | 72   | 64   | 66   | 69   | 70   | 69   |     | 13   | 2  | 5                       | 2    | 3    | 2    | 3    | 3    | 0.049 | *                   |                                    |
| NM_133826    | Atp6v1h       | 100                 | 68   | 75   | 55   | 59   | 69   | 87   | 55   |     | 33   | 7  | 17                      | 4    | 6    | 5    | 8    | 5    | 0.188 |                     |                                    |
| NM_011498    | Bhlhb2 (Dec1) | 100                 | 42   | 50   | 33   | 100  | 66   | 57   | 47   |     | 33   | 6  | 13                      | 5    | 18   | 6    | 5    | 3    | 0.007 | **                  | 25 h                               |
| NM_024469    | Bhlhb3 (Dec2) | 21                  | 16   | 16   | 12   | 100  | 20   | 19   | 11   |     | 5    | 2  | 2                       | 1    | 56   | 2    | 4    | 1    | 0.182 |                     |                                    |
| NM_139294    | Braf          | 100                 | 71   | 71   | 58   | 78   | 79   | 77   | 52   |     | 31   | 5  | 6                       | 3    | 6    | 6    | 5    | 5    | 0.307 |                     |                                    |
| NM_011333    | Ccl2/MCP1     | 88                  | 71   | 92   | 100  | 67   | 75   | 69   | 84   |     | 24   | 6  | 34                      | 47   | 5    | 14   | 4    | 31   | 0.553 |                     |                                    |
| NM_007678    | Cebpa         | 100                 | 79   | 68   | 51   | 65   | 63   | 68   | 47   |     | 23   | 5  | 5                       | 4    | 5    | 5    | 4    | 8    | 0.446 |                     |                                    |
| NM_021455    | ChREBP/Mlxipl | 100                 | 50   | 49   | 35   | 31   | 31   | 35   | 34   |     | 31   | 3  | 8                       | 1    | 4    | 3    | 3    | 5    | 0.022 | *                   | 26 h                               |
| NM_007715    | Clock         | 100                 | 75   | 68   | 56   | 74   | 71   | 77   | 53   |     | 25   | 7  | 6                       | 3    | 9    | 5    | 8    | 4    | 0.277 |                     |                                    |
| NM_007743    | Colla2        | 98                  | 77   | 89   | 100  | 63   | 61   | 67   | 69   |     | 22   | 6  | 18                      | 37   | 4    | 6    | 4    | 20   | 0.376 |                     |                                    |
| NM_009931    | Col4a1        | 100                 | 64   | 83   | 79   | 62   | 58   | 76   | 78   |     | 19   | 5  | 19                      | 24   | 6    | 2    | 2    | 20   | 0.311 |                     |                                    |
| NM_007744    | Comt          | 100                 | 68   | 60   | 40   | 41   | 64   | 65   | 39   |     | 21   | 7  | 2                       | 3    | 3    | 7    | 9    | 5    | 0.797 |                     |                                    |
| NM_001017429 | Cox17         | 100                 | 83   | 76   | 70   | 75   | 82   | 85   | 76   |     | 11   | 4  | 4                       | 4    | 6    | 2    | 6    | 5    | 0.102 |                     |                                    |
| NM_009941    | Cox4i1        | 100                 | 72   | 68   | 61   | 65   | 64   | 61   | 55   |     | 16   | 3  | 2                       | 4    | 3    | 2    | 1    | 4    | 0.130 |                     |                                    |
| NM_007747    | Cox5a         | 100                 | 71   | 63   | 55   | 66   | 65   | 63   | 63   |     | 17   | 4  | 3                       | 1    | 8    | 2    | 1    | 2    | 0.068 |                     |                                    |

|           |             |     |     |     |    |     |     |     |     |  |    |    |    |    |    |    |    |    |  |       |    |                  |
|-----------|-------------|-----|-----|-----|----|-----|-----|-----|-----|--|----|----|----|----|----|----|----|----|--|-------|----|------------------|
| NM_009942 | Cox5b       | 100 | 77  | 67  | 58 | 72  | 66  | 73  | 68  |  | 11 | 6  | 6  | 2  | 4  | 4  | 3  | 4  |  | 0.058 |    |                  |
| NM_007748 | Cox6a1      | 100 | 80  | 76  | 61 | 69  | 68  | 71  | 60  |  | 9  | 5  | 7  | 3  | 4  | 4  | 7  | 5  |  | 0.202 |    |                  |
| NM_009943 | Cox6a2      | 100 | 79  | 80  | 60 | 69  | 68  | 77  | 53  |  | 19 | 6  | 6  | 2  | 4  | 4  | 2  | 5  |  | 0.202 |    |                  |
| NM_007751 | Cox8b       | 100 | 93  | 68  | 58 | 65  | 67  | 77  | 53  |  | 28 | 19 | 3  | 3  | 6  | 7  | 3  | 9  |  | 0.635 |    |                  |
| NM_013495 | Cpt1a       | 96  | 83  | 100 | 84 | 86  | 54  | 44  | 22  |  | 29 | 8  | 9  | 5  | 20 | 4  | 4  | 2  |  | 0.003 | ** | 26, 28, 32 h     |
| NM_009948 | Cpt1b       | 100 | 80  | 72  | 57 | 63  | 66  | 79  | 73  |  | 26 | 10 | 6  | 3  | 6  | 3  | 21 | 21 |  | 0.168 |    |                  |
| NM_009949 | Cpt2        | 100 | 80  | 75  | 61 | 81  | 79  | 95  | 67  |  | 23 | 11 | 3  | 7  | 4  | 5  | 6  | 11 |  | 0.388 |    |                  |
| NM_007771 | Cry1        | 100 | 71  | 65  | 59 | 65  | 66  | 99  | 73  |  | 24 | 7  | 7  | 2  | 4  | 7  | 9  | 10 |  | 0.003 | ** | 32 h             |
| NM_009963 | Cry2        | 100 | 72  | 74  | 62 | 53  | 52  | 60  | 39  |  | 28 | 7  | 3  | 5  | 6  | 4  | 4  | 5  |  | 0.024 | *  | 26 h             |
| NM_026444 | Cs          | 100 | 69  | 60  | 52 | 57  | 71  | 89  | 68  |  | 33 | 9  | 7  | 4  | 7  | 6  | 10 | 4  |  | 0.051 |    |                  |
| NM_009993 | Cyp1a2      | 100 | 63  | 38  | 40 | 32  | 50  | 41  | 26  |  | 33 | 5  | 4  | 4  | 5  | 6  | 6  | 7  |  | 0.600 |    |                  |
| NM_024264 | Cyp27a1     | 100 | 72  | 62  | 51 | 45  | 54  | 48  | 39  |  | 30 | 7  | 5  | 4  | 5  | 3  | 3  | 6  |  | 0.043 | *  | 28 h             |
| NM_021282 | Cyp2e1      | 100 | 84  | 74  | 67 | 66  | 73  | 70  | 30  |  | 35 | 7  | 16 | 11 | 4  | 6  | 5  | 7  |  | 0.084 |    |                  |
| NM_017396 | Cyp3a41a    | 100 | 44  | 45  | 37 | 22  | 36  | 30  | 28  |  | 44 | 4  | 15 | 4  | 2  | 4  | 4  | 6  |  | 0.153 |    |                  |
| NM_010011 | Cyp4a10     | 39  | 32  | 36  | 49 | 83  | 55  | 100 | 39  |  | 23 | 7  | 4  | 11 | 20 | 3  | 29 | 5  |  | 0.136 |    |                  |
| NM_177406 | Cyp4a12a    | 100 | 54  | 42  | 29 | 32  | 39  | 40  | 31  |  | 31 | 6  | 6  | 2  | 3  | 3  | 4  | 10 |  | 0.869 |    |                  |
| NM_007824 | Cyp7a1      | 27  | 45  | 36  | 64 | 47  | 100 | 93  | 42  |  | 11 | 9  | 17 | 23 | 11 | 7  | 29 | 11 |  | 0.678 |    |                  |
| NM_016974 | Dbp         | 100 | 74  | 72  | 55 | 66  | 58  | 67  | 45  |  | 27 | 5  | 3  | 3  | 6  | 2  | 6  | 5  |  | 0.096 |    |                  |
| NM_026172 | Decr1/Nadph | 100 | 66  | 64  | 50 | 64  | 57  | 72  | 45  |  | 30 | 7  | 5  | 6  | 7  | 5  | 12 | 9  |  | 0.423 |    |                  |
| NM_007922 | Elk1        | 100 | 71  | 66  | 55 | 64  | 60  | 68  | 50  |  | 27 | 6  | 5  | 1  | 5  | 3  | 2  | 5  |  | 0.185 |    |                  |
| NM_017399 | Fabp1       | 100 | 76  | 56  | 36 | 42  | 48  | 52  | 41  |  | 29 | 6  | 9  | 12 | 6  | 4  | 10 | 13 |  | 0.815 |    |                  |
| NM_007988 | Fasn        | 28  | 12  | 12  | 7  | 11  | 20  | 30  | 100 |  | 9  | 1  | 3  | 1  | 2  | 4  | 7  | 29 |  | 0.000 | ** | 32 h             |
| NM_019395 | Fbp1        | 100 | 46  | 58  | 43 | 51  | 50  | 52  | 34  |  | 41 | 3  | 5  | 4  | 4  | 5  | 8  | 7  |  | 0.538 |    |                  |
| NM_010197 | Fgf1        | 100 | 84  | 73  | 62 | 60  | 63  | 85  | 49  |  | 38 | 11 | 6  | 12 | 2  | 5  | 9  | 12 |  | 0.399 |    |                  |
| NM_020013 | Fgf21       | 14  | 18  | 28  | 20 | 53  | 100 | 16  | 10  |  | 3  | 5  | 3  | 5  | 36 | 31 | 2  | 2  |  | 0.180 |    |                  |
| NM_010234 | Fos         | 100 | 72  | 78  | 63 | 85  | 65  | 78  | 54  |  | 26 | 6  | 12 | 4  | 15 | 3  | 6  | 4  |  | 0.178 |    |                  |
| NM_008061 | G6pc        | 100 | 52  | 35  | 30 | 5   | 11  | 15  | 13  |  | 5  | 6  | 4  | 6  | 1  | 2  | 3  | 5  |  | 0.001 | ** | 25, 26, 28, 32 h |
| NM_019468 | G6pd2       | 100 | 40  | 72  | 31 | 28  | 35  | 30  | 44  |  | 49 | 16 | 52 | 10 | 15 | 8  | 24 | 25 |  | 0.520 |    |                  |
| NM_008084 | Gapdh       | 84  | 57  | 59  | 49 | 56  | 56  | 72  | 100 |  | 18 | 4  | 8  | 5  | 4  | 6  | 7  | 5  |  | 0.001 | ** | 32 h             |
| NM_010292 | Gek         | 61  | 33  | 26  | 14 | 86  | 100 | 63  | 49  |  | 22 | 8  | 5  | 2  | 11 | 9  | 1  | 8  |  | 0.004 | ** | 25, 26, 32 h     |
| NM_013528 | Gfpt1       | 72  | 72  | 58  | 47 | 65  | 81  | 100 | 56  |  | 13 | 20 | 19 | 13 | 13 | 3  | 36 | 4  |  | 0.678 |    |                  |
| NM_013529 | Gfpt2       | 100 | 74  | 45  | 52 | 60  | 65  | 51  | 49  |  | 34 | 42 | 22 | 8  | 9  | 9  | 28 | 6  |  | 0.482 |    |                  |
| NM_010294 | Gk2         | 91  | 100 | 37  | 35 | 51  | 65  | 44  | 26  |  | 23 | 41 | 14 | 3  | 9  | 13 | 10 | 14 |  | 0.661 |    |                  |
| NM_010271 | Gpd1        | 100 | 83  | 56  | 41 | 59  | 63  | 84  | 68  |  | 15 | 9  | 5  | 7  | 6  | 10 | 3  | 15 |  | 0.119 |    |                  |
| NM_010274 | Gpd2        | 100 | 60  | 39  | 27 | 44  | 58  | 48  | 45  |  | 45 | 7  | 8  | 3  | 3  | 8  | 6  | 11 |  | 0.185 |    |                  |
| NM_008163 | Grb2        | 100 | 80  | 77  | 64 | 58  | 58  | 64  | 60  |  | 20 | 5  | 10 | 6  | 2  | 2  | 7  | 2  |  | 0.068 |    |                  |
| NM_007952 | Grp58       | 48  | 23  | 27  | 24 | 37  | 59  | 100 | 66  |  | 17 | 1  | 10 | 3  | 5  | 7  | 13 | 9  |  | 0.000 | ** | 28, 32 h         |
| NM_008182 | Gsta2       | 100 | 54  | 45  | 36 | 11  | 30  | 25  | 74  |  | 21 | 9  | 23 | 18 | 2  | 4  | 4  | 55 |  | 0.316 |    |                  |
| NM_010357 | Gsta4       | 100 | 57  | 46  | 38 | 23  | 36  | 41  | 53  |  | 19 | 5  | 11 | 6  | 2  | 1  | 3  | 13 |  | 0.047 | *  |                  |
| NM_008194 | Gyk         | 100 | 80  | 70  | 61 | 73  | 71  | 79  | 45  |  | 27 | 10 | 5  | 6  | 5  | 2  | 8  | 4  |  | 0.294 |    |                  |
| NM_030678 | Gys1        | 100 | 68  | 46  | 43 | 69  | 74  | 56  | 53  |  | 26 | 17 | 16 | 8  | 21 | 4  | 4  | 6  |  | 0.701 |    |                  |
| NM_145572 | Gys2        | 100 | 65  | 55  | 50 | 70  | 48  | 55  | 33  |  | 43 | 2  | 1  | 7  | 26 | 3  | 7  | 5  |  | 0.458 |    |                  |
| NM_173371 | H6pd        | 100 | 70  | 72  | 51 | 58  | 37  | 37  | 25  |  | 31 | 4  | 13 | 4  | 17 | 3  | 3  | 3  |  | 0.056 |    |                  |
| NM_178878 | Hadha       | 100 | 76  | 71  | 53 | 63  | 59  | 70  | 50  |  | 27 | 7  | 4  | 7  | 4  | 5  | 7  | 8  |  | 0.387 |    |                  |
| NM_010438 | Hk1         | 100 | 72  | 68  | 53 | 74  | 73  | 65  | 52  |  | 28 | 9  | 19 | 2  | 14 | 7  | 3  | 4  |  | 0.700 |    |                  |
| NM_008255 | Hmger       | 60  | 44  | 44  | 30 | 34  | 35  | 65  | 100 |  | 14 | 3  | 9  | 3  | 3  | 1  | 27 | 63 |  | 0.159 |    |                  |
| NM_145942 | Hmgcs1      | 30  | 17  | 17  | 10 | 11  | 10  | 33  | 100 |  | 9  | 4  | 3  | 3  | 3  | 2  | 23 | 82 |  | 0.198 |    |                  |
| NM_009327 | HNF1        | 79  | 68  | 76  | 60 | 90  | 98  | 100 | 69  |  | 16 | 3  | 5  | 6  | 9  | 10 | 10 | 8  |  | 0.445 |    |                  |
| NM_008284 | Hras1       | 100 | 74  | 63  | 52 | 57  | 62  | 74  | 68  |  | 17 | 3  | 6  | 3  | 1  | 5  | 1  | 2  |  | 0.044 | *  |                  |
| NM_008289 | Hsd11b2     | 100 | 70  | 60  | 49 | 58  | 55  | 63  | 45  |  | 28 | 5  | 3  | 1  | 5  | 1  | 3  | 5  |  | 0.210 |    |                  |
| NM_010548 | Il10        | 100 | 66  | 57  | 48 | 57  | 56  | 64  | 41  |  | 28 | 6  | 3  | 2  | 5  | 4  | 5  | 5  |  | 0.649 |    |                  |
| NM_031168 | Il6         | 100 | 65  | 56  | 46 | 63  | 63  | 74  | 44  |  | 27 | 7  | 6  | 2  | 5  | 4  | 10 | 5  |  | 0.525 |    |                  |
| NM_010591 | Jun         | 89  | 84  | 88  | 64 | 100 | 97  | 78  | 72  |  | 27 | 12 | 21 | 5  | 11 | 8  | 4  | 14 |  | 0.347 |    |                  |

|              |                  |     |     |     |    |     |     |     |    |  |    |    |    |    |    |    |    |    |  |       |    |                  |
|--------------|------------------|-----|-----|-----|----|-----|-----|-----|----|--|----|----|----|----|----|----|----|----|--|-------|----|------------------|
| NM_010699    | Ldha             | 100 | 65  | 98  | 68 | 84  | 71  | 84  | 58 |  | 35 | 5  | 22 | 14 | 11 | 5  | 22 | 13 |  | 0.387 |    |                  |
| NM_008492    | Ldhb             | 100 | 62  | 72  | 57 | 68  | 58  | 70  | 49 |  | 37 | 5  | 10 | 10 | 7  | 2  | 13 | 9  |  | 0.244 |    |                  |
| NM_013580    | Ldhc             | 100 | 57  | 49  | 29 | 61  | 59  | 21  | 34 |  | 38 | 6  | 15 | 11 | 8  | 9  | 10 | 6  |  | 0.140 |    |                  |
| NM_010700    | Ldlr             | 100 | 61  | 66  | 44 | 48  | 63  | 100 | 97 |  | 24 | 7  | 9  | 6  | 5  | 11 | 22 | 21 |  | 0.003 | ** | 32 h             |
| NM_008493    | Lep              | 100 | 69  | 60  | 47 | 60  | 59  | 69  | 45 |  | 28 | 5  | 4  | 1  | 5  | 3  | 6  | 4  |  | 0.326 |    |                  |
| NM_008280    | Lipc             | 100 | 69  | 50  | 47 | 40  | 44  | 46  | 30 |  | 27 | 4  | 10 | 6  | 3  | 3  | 3  | 3  |  | 0.227 |    |                  |
| NM_008509    | Lpl              | 82  | 100 | 66  | 68 | 43  | 41  | 36  | 66 |  | 23 | 15 | 29 | 23 | 10 | 4  | 4  | 37 |  | 0.387 |    |                  |
| NM_008928    | Map2k3           | 100 | 65  | 64  | 50 | 66  | 67  | 91  | 66 |  | 24 | 7  | 4  | 2  | 4  | 3  | 5  | 6  |  | 0.052 |    |                  |
| NM_011840    | Map2k5           | 100 | 79  | 73  | 61 | 57  | 52  | 51  | 43 |  | 26 | 7  | 8  | 3  | 5  | 2  | 5  | 3  |  | 0.049 | *  | 26, 28 h         |
| NM_011944    | Map2k7           | 100 | 78  | 69  | 57 | 72  | 70  | 81  | 58 |  | 28 | 7  | 2  | 3  | 8  | 5  | 7  | 5  |  | 0.222 |    |                  |
| NM_001081292 | Map3k10          | 100 | 71  | 65  | 54 | 70  | 67  | 77  | 50 |  | 25 | 6  | 3  | 1  | 5  | 3  | 3  | 5  |  | 0.430 |    |                  |
| NM_016896    | Map3k14          | 100 | 76  | 75  | 59 | 75  | 70  | 70  | 49 |  | 22 | 8  | 9  | 3  | 5  | 2  | 4  | 4  |  | 0.252 |    |                  |
| NM_011946    | Map3k2           | 100 | 72  | 67  | 55 | 65  | 63  | 70  | 49 |  | 27 | 5  | 3  | 1  | 5  | 3  | 5  | 5  |  | 0.282 |    |                  |
| NM_011947    | Map3k3           | 100 | 78  | 75  | 62 | 68  | 66  | 71  | 52 |  | 25 | 5  | 9  | 5  | 6  | 4  | 2  | 2  |  | 0.375 |    |                  |
| NM_016693    | Map3k6           | 100 | 68  | 69  | 54 | 81  | 58  | 73  | 43 |  | 36 | 6  | 4  | 3  | 18 | 8  | 5  | 3  |  | 0.174 |    |                  |
| NM_011950    | Mapk13           | 100 | 82  | 75  | 64 | 78  | 76  | 81  | 56 |  | 27 | 8  | 5  | 4  | 7  | 5  | 9  | 4  |  | 0.248 |    |                  |
| NM_172632    | Mapk4            | 100 | 71  | 70  | 52 | 63  | 67  | 68  | 40 |  | 28 | 8  | 8  | 4  | 5  | 3  | 4  | 5  |  | 0.680 |    |                  |
| NM_015806    | Mapk6            | 100 | 74  | 71  | 60 | 58  | 51  | 66  | 57 |  | 24 | 8  | 10 | 3  | 5  | 2  | 3  | 2  |  | 0.029 | *  | 26 h             |
| NM_008551    | Mapkap2          | 100 | 80  | 79  | 66 | 80  | 74  | 73  | 58 |  | 18 | 7  | 17 | 7  | 15 | 8  | 2  | 6  |  | 0.555 |    |                  |
| NM_008618    | Mdh1             | 100 | 52  | 43  | 38 | 35  | 39  | 49  | 46 |  | 30 | 4  | 7  | 2  | 6  | 6  | 7  | 4  |  | 0.004 | ** |                  |
| NM_008617    | Mdh2             | 100 | 58  | 54  | 50 | 66  | 58  | 80  | 74 |  | 31 | 2  | 11 | 8  | 10 | 7  | 11 | 7  |  | 0.006 | ** | 32 h             |
| NM_001033713 | Mef2a            | 100 | 74  | 71  | 54 | 62  | 59  | 64  | 49 |  | 27 | 6  | 6  | 1  | 6  | 2  | 5  | 3  |  | 0.113 |    |                  |
| NM_021462    | Mknk2            | 99  | 74  | 100 | 60 | 64  | 37  | 42  | 33 |  | 30 | 3  | 35 | 5  | 12 | 3  | 2  | 8  |  | 0.058 |    |                  |
| NM_010876    | Ncf1             | 100 | 76  | 71  | 57 | 65  | 63  | 76  | 67 |  | 24 | 5  | 11 | 5  | 6  | 2  | 14 | 13 |  | 0.161 |    |                  |
| NM_010877    | Ncf2             | 100 | 66  | 82  | 66 | 60  | 57  | 76  | 92 |  | 25 | 2  | 21 | 10 | 6  | 1  | 20 | 19 |  | 0.026 | *  |                  |
| NM_010885    | Ndufa2           | 100 | 81  | 75  | 69 | 76  | 77  | 79  | 72 |  | 5  | 4  | 7  | 2  | 3  | 4  | 6  | 4  |  | 0.185 |    |                  |
| NM_025348    | Ndufa3           | 100 | 84  | 74  | 65 | 72  | 70  | 71  | 63 |  | 11 | 5  | 11 | 2  | 3  | 2  | 6  | 5  |  | 0.210 |    |                  |
| NM_010886    | Ndufa4           | 100 | 74  | 73  | 60 | 54  | 60  | 62  | 55 |  | 11 | 4  | 4  | 3  | 1  | 1  | 3  | 5  |  | 0.063 |    |                  |
| NM_025987    | Ndufa6           | 100 | 82  | 75  | 74 | 76  | 73  | 72  | 64 |  | 10 | 5  | 4  | 6  | 7  | 3  | 4  | 6  |  | 0.091 |    |                  |
| NM_026610    | Ndufb4           | 100 | 79  | 66  | 58 | 63  | 62  | 70  | 66 |  | 8  | 6  | 7  | 2  | 3  | 1  | 5  | 4  |  | 0.039 | *  |                  |
| NM_145518    | Ndufs1           | 100 | 55  | 58  | 45 | 51  | 48  | 68  | 50 |  | 36 | 5  | 7  | 3  | 8  | 4  | 10 | 5  |  | 0.040 | *  |                  |
| NM_153064    | Ndufs2           | 100 | 64  | 60  | 45 | 47  | 45  | 53  | 45 |  | 25 | 4  | 4  | 3  | 5  | 2  | 3  | 5  |  | 0.023 | *  |                  |
| NM_133666    | Ndufv1           | 100 | 60  | 57  | 41 | 48  | 45  | 52  | 43 |  | 38 | 5  | 7  | 5  | 5  | 2  | 4  | 6  |  | 0.115 |    |                  |
| NM_028388    | Ndufv2           | 100 | 66  | 61  | 54 | 58  | 57  | 65  | 60 |  | 22 | 4  | 3  | 3  | 7  | 3  | 2  | 6  |  | 0.013 | *  |                  |
| NM_017373    | Nfil3            | 100 | 59  | 62  | 56 | 30  | 40  | 47  | 33 |  | 41 | 7  | 7  | 8  | 3  | 7  | 8  | 5  |  | 0.005 | ** | 25, 26, 28 h     |
| NM_010907    | Nfkb1a           | 100 | 81  | 91  | 81 | 40  | 43  | 45  | 49 |  | 24 | 5  | 22 | 11 | 7  | 7  | 1  | 9  |  | 0.030 | *  | 25, 26, 28 h     |
| NM_172203    | Nox1             | 100 | 67  | 58  | 45 | 52  | 50  | 57  | 43 |  | 28 | 8  | 4  | 3  | 4  | 5  | 5  | 4  |  | 0.234 |    |                  |
| NM_015760    | Nox4             | 100 | 75  | 58  | 58 | 49  | 53  | 50  | 27 |  | 38 | 6  | 10 | 9  | 2  | 5  | 9  | 6  |  | 0.006 | ** | 26, 28, 32 h     |
| NM_008719    | Npas2            | 100 | 67  | 60  | 50 | 58  | 61  | 66  | 43 |  | 31 | 6  | 5  | 3  | 5  | 4  | 5  | 9  |  | 0.593 |    |                  |
| NM_011850    | Nr0b2            | 100 | 58  | 68  | 29 | 11  | 17  | 39  | 36 |  | 42 | 7  | 24 | 9  | 3  | 2  | 5  | 4  |  | 0.018 | *  |                  |
| NM_145434    | Nr1d1 (Rev-erba) | 100 | 73  | 71  | 52 | 64  | 65  | 63  | 46 |  | 28 | 6  | 6  | 3  | 5  | 4  | 3  | 4  |  | 0.188 |    |                  |
| NM_011584    | Nr1d2            | 100 | 63  | 61  | 52 | 84  | 28  | 25  | 17 |  | 39 | 6  | 6  | 9  | 33 | 1  | 3  | 2  |  | 0.049 | *  |                  |
| NM_013839    | Nr1h3            | 100 | 63  | 68  | 53 | 64  | 61  | 84  | 67 |  | 25 | 3  | 11 | 4  | 7  | 3  | 3  | 8  |  | 0.082 |    |                  |
| NM_009108    | Nr1h4            | 100 | 72  | 65  | 56 | 46  | 64  | 70  | 47 |  | 34 | 8  | 3  | 5  | 4  | 2  | 4  | 9  |  | 0.255 |    |                  |
| NM_009803    | Nr1i3            | 100 | 85  | 65  | 69 | 54  | 67  | 65  | 39 |  | 39 | 6  | 13 | 12 | 7  | 6  | 5  | 5  |  | 0.387 |    |                  |
| NM_011044    | Pck1             | 100 | 80  | 89  | 57 | 34  | 7   | 10  | 3  |  | 29 | 12 | 27 | 9  | 5  | 2  | 4  | 0  |  | 0.000 | ** | 25, 26, 28, 32 h |
| NM_028994    | Pck2             | 100 | 36  | 21  | 25 | 24  | 19  | 10  | 27 |  | 47 | 10 | 14 | 6  | 10 | 4  | 4  | 9  |  | 0.220 |    |                  |
| NM_008810    | Pdha1            | 100 | 49  | 46  | 44 | 42  | 45  | 56  | 46 |  | 41 | 5  | 6  | 6  | 6  | 2  | 13 | 5  |  | 0.064 |    |                  |
| NM_013743    | Pdk4             | 100 | 87  | 90  | 56 | 49  | 45  | 55  | 53 |  | 30 | 18 | 28 | 8  | 4  | 1  | 7  | 3  |  | 0.055 |    |                  |
| NM_011065    | Per1             | 86  | 76  | 79  | 72 | 100 | 64  | 94  | 36 |  | 17 | 8  | 14 | 13 | 27 | 4  | 11 | 3  |  | 0.166 |    |                  |
| NM_011066    | Per2             | 46  | 36  | 39  | 28 | 71  | 100 | 84  | 54 |  | 14 | 4  | 6  | 2  | 9  | 10 | 6  | 5  |  | 0.038 | *  | 25, 26, 32 h     |
| NM_011067    | Per3             | 100 | 89  | 76  | 66 | 78  | 76  | 81  | 54 |  | 37 | 10 | 4  | 9  | 9  | 2  | 7  | 6  |  | 0.173 |    |                  |
| NM_008824    | Pfkfb1           | 100 | 57  | 67  | 54 | 83  | 54  | 72  | 51 |  | 31 | 6  | 11 | 3  | 22 | 4  | 11 | 9  |  | 0.205 |    |                  |

|              |           |     |    |     |    |     |    |    |     |  |    |    |    |    |    |    |    |    |  |       |    |              |
|--------------|-----------|-----|----|-----|----|-----|----|----|-----|--|----|----|----|----|----|----|----|----|--|-------|----|--------------|
| NM_133232    | Pfkfb3    | 100 | 73 | 66  | 53 | 72  | 66 | 75 | 51  |  | 25 | 6  | 4  | 0  | 6  | 1  | 5  | 4  |  | 0.191 |    |              |
| NM_008826    | Pfkl      | 100 | 67 | 64  | 51 | 56  | 57 | 64 | 53  |  | 24 | 5  | 10 | 3  | 3  | 2  | 3  | 4  |  | 0.119 |    |              |
| NM_001081274 | Pgd       | 100 | 62 | 83  | 53 | 58  | 60 | 74 | 90  |  | 23 | 4  | 28 | 5  | 5  | 3  | 11 | 4  |  | 0.001 | ** | 32 h         |
| NM_013631    | Pklr      | 100 | 66 | 56  | 48 | 58  | 69 | 74 | 64  |  | 32 | 6  | 5  | 3  | 3  | 6  | 7  | 11 |  | 0.151 |    |              |
| NM_011099    | Pkm2      | 61  | 65 | 100 | 70 | 44  | 47 | 37 | 81  |  | 9  | 7  | 64 | 27 | 5  | 11 | 4  | 39 |  | 0.297 |    |              |
| NM_008898    | POR       | 69  | 64 | 74  | 58 | 100 | 60 | 55 | 43  |  | 23 | 5  | 8  | 10 | 32 | 4  | 5  | 4  |  | 0.149 |    |              |
| NM_011144    | Ppara     | 100 | 64 | 62  | 38 | 43  | 36 | 36 | 29  |  | 35 | 7  | 3  | 3  | 3  | 1  | 3  | 6  |  | 0.058 |    |              |
| NM_011145    | Ppard     | 58  | 43 | 45  | 36 | 40  | 36 | 47 | 100 |  | 14 | 4  | 4  | 2  | 3  | 2  | 3  | 26 |  | 0.000 | ** | 32 h         |
| NM_011146    | Pparg     | 100 | 72 | 64  | 53 | 52  | 60 | 66 | 50  |  | 26 | 14 | 8  | 4  | 4  | 8  | 9  | 3  |  | 0.452 |    |              |
| NM_008904    | Ppargc1a  | 100 | 73 | 78  | 62 | 75  | 63 | 65 | 50  |  | 29 | 5  | 14 | 6  | 8  | 3  | 7  | 6  |  | 0.145 |    |              |
| NM_010936    | PXR/Nr1i2 | 100 | 81 | 69  | 68 | 65  | 60 | 56 | 56  |  | 14 | 6  | 8  | 5  | 8  | 3  | 7  | 5  |  | 0.048 | *  |              |
| NM_001099624 | Rapgef2   | 100 | 69 | 83  | 63 | 58  | 61 | 71 | 52  |  | 32 | 5  | 24 | 7  | 8  | 5  | 6  | 3  |  | 0.266 |    |              |
| NM_009024    | RARa      | 100 | 68 | 61  | 47 | 57  | 53 | 63 | 47  |  | 28 | 5  | 5  | 1  | 5  | 3  | 5  | 5  |  | 0.124 |    |              |
| NM_011243    | RARb      | 100 | 70 | 62  | 52 | 64  | 60 | 70 | 56  |  | 29 | 6  | 6  | 2  | 6  | 3  | 8  | 4  |  | 0.058 |    |              |
| NM_013646    | Rora      | 100 | 56 | 59  | 46 | 64  | 46 | 52 | 41  |  | 44 | 5  | 10 | 7  | 12 | 3  | 6  | 8  |  | 0.081 |    |              |
| NM_001043354 | Rorb      | 100 | 82 | 76  | 62 | 73  | 76 | 76 | 54  |  | 23 | 8  | 6  | 8  | 4  | 6  | 5  | 2  |  | 0.605 |    |              |
| NM_011281    | Rorc      | 100 | 66 | 71  | 59 | 67  | 76 | 76 | 50  |  | 32 | 6  | 9  | 4  | 5  | 4  | 3  | 4  |  | 0.740 |    |              |
| NM_011299    | Rps6ka2   | 100 | 73 | 69  | 61 | 67  | 64 | 71 | 51  |  | 26 | 6  | 4  | 2  | 5  | 2  | 5  | 6  |  | 0.113 |    |              |
| NM_011305    | RXRa      | 100 | 76 | 72  | 59 | 62  | 55 | 60 | 44  |  | 19 | 3  | 7  | 3  | 6  | 1  | 3  | 3  |  | 0.076 |    |              |
| NM_011306    | RXRb      | 100 | 76 | 76  | 55 | 66  | 59 | 61 | 44  |  | 22 | 6  | 10 | 2  | 10 | 3  | 3  | 4  |  | 0.154 |    |              |
| NM_009127    | Scd1      | 100 | 34 | 29  | 12 | 6   | 12 | 11 | 20  |  | 31 | 9  | 11 | 2  | 2  | 2  | 3  | 3  |  | 0.007 | ** |              |
| NM_023281    | Sdha      | 100 | 60 | 56  | 42 | 43  | 44 | 49 | 36  |  | 35 | 6  | 7  | 5  | 6  | 4  | 3  | 3  |  | 0.171 |    |              |
| NM_025321    | Sdhc      | 100 | 58 | 53  | 42 | 45  | 45 | 57 | 49  |  | 30 | 3  | 7  | 3  | 3  | 1  | 2  | 4  |  | 0.055 |    |              |
| NM_008871    | Serpine1  | 79  | 64 | 100 | 64 | 83  | 74 | 70 | 61  |  | 26 | 9  | 47 | 12 | 9  | 10 | 2  | 6  |  | 0.563 |    |              |
| NM_019812    | Sirt1     | 100 | 68 | 68  | 56 | 58  | 50 | 58 | 39  |  | 28 | 6  | 11 | 3  | 6  | 3  | 8  | 5  |  | 0.055 |    |              |
| NM_022432    | Sirt2     | 100 | 58 | 78  | 60 | 57  | 54 | 62 | 49  |  | 21 | 4  | 14 | 3  | 3  | 6  | 1  | 9  |  | 0.051 |    |              |
| NM_007451    | Slc25a5   | 100 | 65 | 71  | 53 | 54  | 60 | 74 | 67  |  | 34 | 5  | 16 | 4  | 5  | 1  | 7  | 5  |  | 0.008 | ** | 32 h         |
| NM_011400    | Slc2a1    | 100 | 77 | 82  | 54 | 65  | 60 | 84 | 57  |  | 30 | 7  | 13 | 1  | 5  | 7  | 7  | 4  |  | 0.121 |    |              |
| NM_031197    | Slc2a2    | 100 | 55 | 31  | 32 | 26  | 33 | 46 | 50  |  | 36 | 5  | 8  | 8  | 5  | 4  | 11 | 4  |  | 0.007 | ** | 32 h         |
| NM_011401    | Slc2a3    | 100 | 70 | 48  | 47 | 50  | 53 | 60 | 52  |  | 31 | 5  | 4  | 5  | 3  | 3  | 7  | 5  |  | 0.084 |    |              |
| NM_009204    | Slc2a4    | 100 | 63 | 56  | 47 | 58  | 57 | 61 | 46  |  | 34 | 5  | 4  | 2  | 7  | 3  | 3  | 4  |  | 0.300 |    |              |
| NM_008063    | Slc37a4   | 70  | 68 | 63  | 51 | 100 | 74 | 91 | 52  |  | 26 | 11 | 6  | 11 | 42 | 2  | 11 | 7  |  | 0.642 |    |              |
| NM_009270    | Sqle      | 56  | 40 | 48  | 28 | 33  | 33 | 63 | 100 |  | 17 | 4  | 12 | 3  | 5  | 4  | 30 | 71 |  | 0.231 |    |              |
| NM_011480    | Srebf1    | 80  | 31 | 28  | 18 | 16  | 34 | 59 | 100 |  | 22 | 6  | 7  | 1  | 2  | 9  | 14 | 16 |  | 0.000 | ** | 32 h         |
| NM_017376    | Tef       | 100 | 94 | 82  | 69 | 58  | 55 | 53 | 30  |  | 41 | 11 | 8  | 15 | 4  | 3  | 5  | 5  |  | 0.011 | *  | 26, 28, 32 h |
| NM_011577    | Tgfb1     | 100 | 72 | 71  | 59 | 60  | 60 | 69 | 55  |  | 26 | 3  | 10 | 7  | 5  | 4  | 3  | 1  |  | 0.354 |    |              |
| NM_011593    | Timp1     | 100 | 68 | 73  | 56 | 61  | 62 | 71 | 49  |  | 27 | 5  | 9  | 3  | 5  | 3  | 4  | 5  |  | 0.293 |    |              |
| NM_013693    | Tnf       | 100 | 67 | 71  | 53 | 59  | 60 | 71 | 49  |  | 29 | 6  | 15 | 6  | 6  | 6  | 7  | 2  |  | 0.677 |    |              |
| NM_009422    | Traf2     | 100 | 71 | 65  | 49 | 60  | 57 | 71 | 52  |  | 28 | 4  | 11 | 3  | 5  | 3  | 4  | 3  |  | 0.210 |    |              |
| NM_009463    | Ucp1      | 100 | 68 | 60  | 51 | 66  | 65 | 70 | 46  |  | 34 | 5  | 3  | 3  | 5  | 3  | 3  | 4  |  | 0.471 |    |              |
| NM_011671    | Ucp2      | 100 | 71 | 63  | 51 | 60  | 58 | 68 | 46  |  | 27 | 5  | 3  | 1  | 5  | 3  | 5  | 6  |  | 0.286 |    |              |
| NM_009464    | Ucp3      | 100 | 69 | 78  | 62 | 69  | 70 | 75 | 54  |  | 29 | 6  | 10 | 1  | 5  | 7  | 4  | 3  |  | 0.217 |    |              |
| NM_025650    | Uqcr      | 100 | 81 | 74  | 61 | 68  | 70 | 70 | 66  |  | 10 | 4  | 8  | 1  | 3  | 3  | 6  | 4  |  | 0.183 |    |              |
| NM_026219    | Uqcrb     | 100 | 75 | 62  | 57 | 60  | 63 | 64 | 63  |  | 9  | 5  | 4  | 3  | 4  | 2  | 3  | 2  |  | 0.054 |    |              |
| NM_025407    | Uqcrc1    | 100 | 63 | 57  | 41 | 53  | 47 | 57 | 45  |  | 37 | 6  | 6  | 7  | 6  | 4  | 4  | 6  |  | 0.200 |    |              |
| NM_025899    | Uqcrc2    | 100 | 55 | 56  | 45 | 47  | 45 | 57 | 45  |  | 39 | 5  | 8  | 5  | 5  | 1  | 6  | 5  |  | 0.048 | *  |              |
| NM_025710    | Uqcrfs1   | 100 | 60 | 62  | 49 | 53  | 53 | 62 | 51  |  | 22 | 4  | 5  | 2  | 5  | 2  | 4  | 5  |  | 0.065 |    |              |
| NM_016808    | Usp2      | 100 | 82 | 66  | 59 | 74  | 61 | 79 | 46  |  | 22 | 9  | 3  | 3  | 3  | 3  | 6  | 4  |  | 0.142 |    |              |
| NM_001025250 | Vegfa     | 100 | 57 | 61  | 52 | 69  | 62 | 60 | 51  |  | 27 | 4  | 7  | 4  | 5  | 3  | 3  | 3  |  | 0.050 |    |              |
